# Supplementary material
Source: PubMed Central journal article supplement (PMC4467170)
Supplement: NIHMS689669-supplement-Supp_TableS1-S2.pdf [file NIHMS689669-supplement-Supp_TableS1-S2.pdf]

**Supplemental Table 1.** Oligonucleotides used in this study.

| Oligonucleotide     | Description        | Sequence                                                   |
|---------------------|--------------------|------------------------------------------------------------|
| <b>qPCR oligos:</b> |                    |                                                            |
| 311                 | rot-6xHis-3'-RXho  | 5'-CCCCTCGAG-TTAGTGATGGTGATGGTGATG-CACAGCAATAATTGCGTTTAAAC |
| 313                 | rot5'F-NdeI        | 5'-CCCC-CATATG-AAAAAAGTAAATAACGACACTG                      |
| 491                 | paur-F-PstI        | 5'-CCC-CTGCAG-TTGATTATGATTATTTAAATAGTTATC                  |
| 492                 | paur-R-KpnI        | 5'-CCC-GGTACC-CTTATAAATAAAAATATTAATTTAATTTTTC              |
| 493                 | pssp-F-PstI        | 5'-CCC-CTGCAG-CATTCATATTAATCTACCTTTGGC                     |
| 494                 | pssp-R-KpnI        | 5'-CCC-GGTACC-CCTCCAAAAAATTTATTTACAAGTTA                   |
| 495                 | pstaphopain-F-PstI | 5'-CCC-CTGCAG-GTGTGGCATTTTAAATATAAGACAT                    |
| 496                 | pstaphopain-R-KpnI | 5'-CCC-GGTACC-CCTTTATTTTATTATAAAAATAATTATATTA              |
| 497                 | pspl-F-PstI        | 5'-CCC-GGTACC-GGGAACATAATCGCTAATAATGTT                     |
| 498                 | pspl-R-KpnI        | 5'-CCC-GGTACC-CAAATTTATTTTATAGTTAATGTATCT                  |
| 499                 | paur-R-BIO         | 5'-CTTATAAATAAAAATATTAATTTAATTTTTC                         |
| 500                 | pssp-R-BIO         | 5'-CCTCCAAAAAATTTATTTACAAGTTA                              |
| 501                 | pstaphopain-R-BIO  | 5'-CCTTTATTTTATTATAAAAATAATTATATTA                         |
| 502                 | pspl-R-BIO         | 5'-CAAATTTATTTTATAGTTAATGTATCT                             |
| 87                  | LukAB intra 5'     | 5'-CCCCGAATTCAAAGAAGGATAATATTGAAAGG                        |
| 372                 | LukAB intra 3'     | 5'-AGTATCACCATCAAGATTCTTC                                  |
| 278                 | 16S P1-RT          | 5'-TGAGATGTTGGGTAAAGTCCCGCA                                |
| 279                 | 16S P2-RT          | 5'-CGGTTTCGCTGCCCTTTGTATTGT                                |
| 879                 | aureolysin-F       | 5'-GGCAGCATTAACTTGTGA                                      |
| 880                 | aureolysin-R       | 5'-TTTAATGCTTTGACCGCATC                                    |
| 881                 | staphopain-F       | 5'-CTATTGCAAACGCTGAGAGC                                    |
| 882                 | staphopain-R       | 5'-ACGTACGTCAGTAGGAACACTCTT                                |
| 883                 | ssp V8 protease-F  | 5'-CAAGCAAACAGCAAACACCT                                    |

|                       |                   |                                                         |
|-----------------------|-------------------|---------------------------------------------------------|
| 884                   | ssp V8 protease-R | 5'-TGGTGACGATCGTTATTTGG                                 |
| 887                   | splF-F            | 5'-AGTGGTGTTACATGGATGGG                                 |
| 888                   | splF-R            | 5'-TCATCACCGACTTTCATGTG                                 |
| 789                   | rot-F             | 5'-AAGAGCGTCCTGTTGACGAT                                 |
| 790                   | rot-R             | 5'-TTTGCATTGCTGTTGCTCTA                                 |
| <b>Cloning Oligos</b> |                   |                                                         |
| JMM032                | pOS1-MCS          | 5'-TAT-GTA-AGG-TAC-CAC-GCG-TGA-GCT-CTC-TAG-AC           |
| JMM033                | pOS1-MCS          | 5'-TCG-AGT-CTA-GAG-AGC-TCA-CGC-GTG-GTA-CCT-TAC-A        |
| VJT423                | rot mutant        | 5'-GGGGACAAGTTTGTACAAAAAAGCAGGCTTACACCGATGGTAAAACAATACG |
| VJT424                | rot mutant        | 5'-TCCCCCGGGGTGTAAGTTTAATAGCATAAAAAAG                   |
| VJT425                | rot mutant        | 5'-TCCCCCGGGTTTTTTCATGCTAAACATCTCCC                     |
| VJT426                | rot mutant        | 5'-GGGGACCACTTTGTACAAGAAAGCTGGGTTTCATGACAGTATTCGAATGATG |
|                       |                   |                                                         |
|                       |                   |                                                         |
|                       |                   |                                                         |
|                       |                   |                                                         |
|                       |                   |                                                         |

| Genes negatively regulated by Rot |           |                                                                | Fold higher in ro |               |
|-----------------------------------|-----------|----------------------------------------------------------------|-------------------|---------------|
| Locus                             | gene name | description                                                    | WT (mid log)      | WT (late log) |
| SACOL0128                         |           | phosphonate ABC transporter, phosphonate-binding protein       | 2.8               |               |
| SACOL0155                         |           | cation efflux family protein                                   |                   | 2.6           |
| SACOL0156                         |           | hypothetical protein                                           |                   | 2.8           |
| SACOL0163                         |           | drug transporter, putative                                     | 2.1               |               |
| SACOL0189                         |           | hypothetical protein                                           | 2.3               |               |
| SACOL0198                         |           | conserved hypothetical protein                                 |                   | 3.6           |
| SACOL0222                         | ldh       | L-lactate dehydrogenase                                        |                   | 2.4           |
| SACOL0253                         | rbsk      | ribokinase                                                     |                   | 2.2           |
| SACOL0254                         |           | ribose transport protein                                       |                   | 2.6           |
| SACOL0270                         |           | staphyloxanthin biosynthesis protein, putative                 | 2.4               |               |
| SACOL0271                         |           | conserved hypothetical protein                                 |                   | 2.2           |
| SACOL0285                         |           | conserved hypothetical protein                                 | 2.5               |               |
| SACOL0285                         |           | conserved hypothetical protein                                 | 2.6               | 5.7           |
| SA0352                            |           | 30S ribosomal protein S6                                       |                   | 2.9           |
| SACOL0357                         | dut       | prophage L54a, deoxyuridine 5-triphosphate nucleotidohydrolase |                   | 2.9           |
| SACOL0454                         |           | sodium:dicarboxylate symporter family protein                  |                   | 2.4           |
| SACOL0492                         |           | hypothetical protein                                           |                   | 2.5           |
| SACOL0645                         |           | conserved hypothetical protein                                 | 2.1               |               |
| SACOL0858                         | empbp     | secretory extracellular matrix and plasma binding protein      |                   | 2.2           |
| SACOL0865                         |           | hypothetical protein                                           | 2.2               |               |
| SACOL0869                         |           | phosphoglycerate mutase family protein                         |                   | 2.5           |
| SACOL0892                         |           | pathogenicity island protein, authentic frameshift             |                   | 8.7           |
| SACOL0985                         |           | surface protein, putative                                      |                   | 6.0           |
| SACOL1041                         |           | hypothetical protein                                           | 3.2               |               |
| SACOL1349                         |           | conserved hypothetical protein                                 | 5.4               | 2.1           |
| SACOL1387                         |           | conserved hypothetical protein                                 | 2.8               | 2.3           |
| SACOL1415                         |           | peptide ABC transporter, ATP-binding protein                   | 5.8               |               |
| SACOL1416                         |           | peptide ABC transporter, permease protein, putative            | 4.2               |               |
| SACOL1417                         |           | peptide ABC transporter, permease protein                      | 5.5               |               |
| SACOL1476                         |           | amino acid permease                                            |                   | 2.5           |
| SACOL1481                         |           | conserved hypothetical protein                                 | 3.6               |               |
| SACOL1532                         |           | hypothetical protein                                           | 7.0               |               |
| SACOL1532                         |           | hypothetical protein                                           | 8.4               | 3.5           |
| SACOL1533                         |           | hypothetical protein                                           | 3.5               |               |
| SACOL1769                         | rpsD      | ribosomal protein S4                                           |                   | 3.7           |
| SA1771                            |           | conserved hypothetical protein                                 |                   | 2.4           |
| SA1773                            |           | conserved hypothetical protein                                 |                   | 2.6           |

|           |       |                                                                   |      |     |
|-----------|-------|-------------------------------------------------------------------|------|-----|
| SA1774    |       | conserved hypothetical protein                                    |      | 2.3 |
| SA1775    | clp   | conserved putative Clp protease                                   |      | 2.2 |
| SA1780    |       | conserved hypothetical protein                                    |      | 2.5 |
| SA1783    |       | conserved hypothetical protein                                    |      | 2.8 |
| SA1790    |       | conserved hypothetical protein                                    |      | 3.7 |
| SA1792    |       | single-strand DNA-binding protein                                 |      | 2.8 |
| SA1795    |       | conserved hypothetical protein                                    |      | 2.3 |
| SA1799    |       | conserved hypothetical protein                                    |      | 3.2 |
| SA1803    |       | conserved hypothetical                                            |      | 2.4 |
| SA1804    |       | conserved DNA binding protein- putative transcriptional regulator |      | 3.5 |
| SACOL1880 | lukD  | leukocidin D                                                      |      | 3.5 |
| SACOL1865 | spE   | serine protease SpE, putative                                     | 43.7 |     |
| SACOL1866 | spD   | serine protease SpD, putative                                     | 28.5 |     |
| SACOL1870 |       | hypothetical protein                                              | 27.2 |     |
| SACOL1971 |       | hypothetical protein                                              | 3.7  | 2.1 |
| SACOL1993 |       | conserved hypothetical protein                                    | 2.1  |     |
| SACOL1995 |       | conserved hypothetical protein                                    | 2.8  |     |
| SACOL2004 | lukA  | leukocidin A                                                      | 2.4  |     |
| SACOL2006 | lukB  | leukocidin B                                                      | 2.3  |     |
| SACOL2220 | rplO  | ribosomal protein L15                                             |      | 2.6 |
| SACOL2221 | rpmD  | ribosomal protein L30p/L7e                                        |      | 2.4 |
| SACOL2222 | rpsE  | ribosomal protein S5                                              |      | 2.2 |
| SACOL2223 | rplR  | ribosomal protein L18                                             |      | 2.2 |
| SACOL2224 | rplF  | ribosomal protein L6                                              |      | 2.4 |
| SACOL2225 | rpsH  | ribosomal protein S8                                              |      | 2.2 |
| SACOL2226 | rpsN2 | ribosomal protein S14                                             |      | 2.6 |
| SACOL2227 | rplE  | ribosomal protein L5                                              |      | 2.2 |
| SACOL2228 | rplX  | ribosomal protein L24                                             |      | 2.3 |
| SACOL2231 | rpmC  | ribosomal protein L29                                             |      | 2.1 |
| SACOL2279 |       | transporter, putative                                             | 4.2  |     |
| SACOL2353 | tcaR  | transcriptional regulator TcaR                                    |      | 8.6 |
| SACOL2361 |       | hypothetical protein                                              |      | 3.6 |
| SACOL2451 |       | amino acid ABC transporter, amino acid-binding protein            | 2.0  |     |
| SACOL2479 |       | conserved hypothetical protein                                    |      | 2.2 |
| SACOL2552 |       | PTS system, IIABC components                                      |      | 4.1 |
| SACOL2559 |       | hypothetical protein                                              | 2.1  |     |
| SACOL2601 |       | conserved hypothetical protein                                    | 2.4  | 4.1 |
| SACOL2663 |       | PTS system, fructose-specific IIABC components                    |      | 5.8 |
| SACOL2664 | manA  | mannose-6-phosphate isomerase                                     |      | 6.2 |
| SACOL2669 |       | conserved hypothetical protein                                    |      | 2.1 |
| SACOL0492 |       | hypothetical protein                                              | 5.6  |     |

|           |       |                                                                            |      |      |
|-----------|-------|----------------------------------------------------------------------------|------|------|
| SA0882    |       | conserved hypothetical protein, similar to competence transcription factor | 3.0  |      |
| SA0901    | sspA  | serine protease; V8 protease; glutamyl endopeptidase                       | 29.9 | 15.0 |
| SACOL2007 |       | peptidase, M20/M25/M40 family, authentic frameshift                        | 2.7  |      |
| SAS018    |       | conserved hypothetical protein                                             | 2.5  |      |
| SACOL0136 | cap5A | capsular polysaccharide biosynthesis protein                               |      | 4.3  |
| SACOL0137 | cap5B | capsular polysaccharide biosynthesis protein                               |      | 3.5  |
| SACOL0138 | cap5C | capsular polysaccharide biosynthesis protein                               | 6.4  | 2.8  |
| SACOL0139 | cap5D | capsular polysaccharide biosynthesis protein                               | 5.8  |      |
| SACOL0140 | cap5E | capsular polysaccharide biosynthesis protein                               | 4.6  | 2.4  |
| SACOL0141 | cap5F | capsular polysaccharide biosynthesis protein                               | 3.6  | 2.3  |
| SACOL0142 | cap5G | UDP-N-acetylglucosamine 2-epimerase                                        |      | 3.4  |
| SACOL0143 | cap5H | capsular polysaccharide biosynthesis protein                               |      | 5.7  |
| SACOL0144 | cap5I | capsular polysaccharide biosynthesis protein                               | 5.2  | 5.4  |
| SACOL0145 | cap5J | capsular polysaccharide biosynthesis protein                               |      | 7.8  |
| SACOL0146 | cap5K | capsular polysaccharide biosynthesis protein                               | 3.1  | 6.5  |
| SACOL0147 | cap5L | capsular polysaccharide biosynthesis protein                               |      | 6.8  |
| SACOL0148 | cap5M | capsular polysaccharide biosynthesis galactosyltransferase                 |      | 5.5  |
| SACOL0149 | cap5N | capsular polysaccharide biosynthesis protein                               | 2.4  | 5.3  |
| SACOL0150 | cap5O | capsular polysaccharide biosynthesis protein                               |      | 3.9  |
| SACOL0151 | cap5P | UDP-N-acetylglucosamine 2-epimerase                                        |      | 4.6  |
| SACOL2003 | hIb   | phospholipase C                                                            | 8.4  |      |
| SACOL2422 | hIgB  | gamma hemolysin, component B                                               | 5.2  |      |
| SACOL2421 | hIgC  | gamma hemolysin, component C                                               | 5.3  |      |
| SACOL1173 | hIY   | alpha-hemolysin precursor                                                  | 2.8  |      |
| SACOL2068 | kdpA  | potassium-transporting ATPase, A subunit                                   | 8.3  |      |
| SACOL2067 | kdpB  | potassium-transporting P-type ATPase, B subunit                            | 4.4  |      |
| SACOL2066 | kdpC  | potassium-transporting ATPase, C subunit                                   | 2.9  |      |
| SACOL2070 | kdpD  | sensor histidine kinase KdpD                                               | 7.8  |      |
| SACOL2071 | kdpE  | DNA-binding response regulator KdpE                                        | 6.4  |      |
| SACOL0248 | lrgB  | lrgB protein                                                               | 2.5  |      |
| SACOL1881 | lukE  | leukocidin E                                                               | 10.3 |      |
| SACOL2002 | map   | map protein, authentic frameshift                                          | 2.3  |      |
| SACOL0078 | plc   | 1-phosphatidylinositol phosphodiesterase                                   | 10.9 |      |
| SACOL1869 | spIA  | serine protease SpIA                                                       | 74.9 |      |
| SACOL1868 | spIB  | serine protease SpIB                                                       | 42.0 |      |
| SACOL1867 | spIC  | serine protease SpIC                                                       | 64.4 |      |
| SACOL1056 | sspB1 | cysteine protease precursor SspB1                                          | 30.5 | 17.4 |
| SACOL1970 | sspB2 | cysteine protease precursor SspB2                                          | 6.0  |      |
| SACOL1055 | sspC  | sspC protein                                                               | 24.9 | 19.4 |
| SACOL0164 |       | gramicidin S synthetase 2 related protein                                  | 2.3  |      |
| SACOL1481 |       | conserved hypothetical protein                                             | 3.1  |      |

| t strain in comparison to |                          |
|---------------------------|--------------------------|
| Complement<br>(mid log)   | Complement<br>(late log) |
| 3.8                       |                          |
|                           | 3.7                      |
|                           | 3.1                      |
| 3.9                       |                          |
| 3.4                       |                          |
|                           | 5.8                      |
|                           | 5.3                      |
|                           | 2.6                      |
|                           | 2.8                      |
| 7.7                       |                          |
|                           | 4.3                      |
| 4.8                       |                          |
| 4.5                       | 16.1                     |
|                           | 3.3                      |
|                           | 9.9                      |
|                           | 4.7                      |
|                           | 3.8                      |
| 2.9                       |                          |
|                           | 3.5                      |
| 4.0                       |                          |
|                           | 2.5                      |
|                           | 9.7                      |
|                           | 5.9                      |
| 18.0                      |                          |
| 7.5                       | 2.4                      |
| 4.5                       | 5.8                      |
| 8.1                       |                          |
| 6.1                       |                          |
| 8.1                       |                          |
|                           | 5.9                      |
| 4.7                       |                          |
| 7.2                       |                          |
| 6.9                       | 2.6                      |
| 4.4                       |                          |
|                           | 8.6                      |
|                           | 4.4                      |
|                           | 4.8                      |

|      |      |
|------|------|
|      | 5.8  |
|      | 3.9  |
|      | 4.5  |
|      | 7.1  |
|      | 8.9  |
|      | 8.2  |
|      | 5.4  |
|      | 7.8  |
|      | 8.4  |
|      | 7.3  |
|      | 5.5  |
| 47.5 |      |
| 27.9 |      |
| 59.3 |      |
| 8.1  | 16.1 |
| 2.7  |      |
| 2.6  |      |
| 11.8 |      |
| 9.4  |      |
|      | 3.4  |
|      | 4.8  |
|      | 4.1  |
|      | 4.8  |
|      | 4.6  |
|      | 4.3  |
|      | 5.6  |
|      | 4.4  |
|      | 4.8  |
|      | 4.5  |
| 3.4  |      |
|      | 13.1 |
|      | 3.3  |
| 2.2  |      |
|      | 2.1  |
|      | 6.5  |
| 2.8  |      |
| 4.9  | 2.7  |
|      | 14.7 |
|      | 15.4 |
|      | 2.4  |
| 6.8  |      |

|      |      |
|------|------|
| 7.2  |      |
| 44.8 | 23.3 |
| 6.3  |      |
| 5.9  |      |
|      | 18.7 |
|      | 9.3  |
| 9.8  | 5.9  |
| 6.0  |      |
| 5.2  | 6.8  |
| 7.9  | 12.0 |
|      | 10.7 |
|      | 25.2 |
| 5.0  | 23.8 |
|      | 18.7 |
| 2.8  | 18.4 |
|      | 16.9 |
|      | 16.9 |
| 2.2  | 15.3 |
|      | 12.8 |
|      | 11.6 |
| 84.9 |      |
| 11.0 |      |
| 11.9 |      |
| 9.7  |      |
| 9.5  |      |
| 4.6  |      |
| 3.4  |      |
| 21.6 |      |
| 17.9 |      |
| 4.6  |      |
| 16.2 |      |
| 6.1  |      |
| 41.0 |      |
| 90.5 |      |
| 37.6 |      |
| 60.6 |      |
| 47.6 | 38.2 |
| 20.7 |      |
| 33.4 | 39.3 |
| 4.2  |      |
| 4.1  |      |
